## RESEARCH ARTICLE

# Flight activity and age cause wing damage in house flies

Henja-Niniane Wehmann\*, Thomas Engels and Fritz-Olaf Lehmann<sup>‡</sup>

## ABSTRACT

Wing damage attenuates aerial performance in many flying animals such as birds, bats and insects. Insect wings are especially light in order to reduce inertial power requirements for flight at elevated wing flapping frequencies. There is a continuing debate on the factors causing wing damage in insects, including collisions with objects, mechanical stress during flight activity, and aging. This experimental study addressed the reasons for and significance of wing damage for flight in the house fly *Musca domestica*. We determined natural wing area loss under two housing conditions and recorded flight activity and flight ability throughout the animals' lifetime. Our data show that in animals with eventually pronounced damage, wing damage occurs on average after 6 h of flight, is sex specific and depends on housing conditions. Statistical tests show that physiological age and flight activity have similar significance as predictors for wing damage. Tests on freely flying flies showed that minimum wing area for active flight is approximately 10–34% below the initial area and requires a left–right wing area asymmetry of less than approximately 25%. Our findings broadly confirm predictions from simple aerodynamic theory based on mean wing velocity and area, and are also consistent with previous wing damage measurements in other insect species.

**KEY WORDS:** Insect flight, Loss of wing area, Locomotor capacity, *Musca domestica*

## INTRODUCTION

Insect wings are delicate structures which often break over the course of an animal's lifetime. Multiple reasons for wing damage have been proposed, including interactions between conspecifics during sexual competition and mating (Alcock, 1996; Burkhard et al., 2002; Pinheiro, 1990; Ragland and Sohal, 1973), injuries during oviposition, building and defending a nest, and intraspecific and interspecific aggression, competition and predation (Benson, 1972; Nalepa, 2012; O'Neill et al., 2015; Rajabi et al., 2020). Besides the above reasons, wing damage predominantly results from the collision of wings with objects (Burkhard et al., 2002; Foster and Cartar, 2011; Rhains and Brodersen, 2012) and thus increases with increasing flight activity (Hayes et al., 1998). In general, adverse habitats (Lee et al., 2006) and high population densities of animals in captivity favour wing damage (Ragland and Sohal, 1973). Wing damage also depends on the sex ratio within an insect group (Rhains and Brodersen, 2012) and is sex specific (Burkhard et al., 2002; Kiritani et al., 2013; Lee et al., 2006; Mueller and Wolf-Mueller, 1993; Ragland and Sohal, 1973; Rhains and Brodersen, 2012). The

relevance of wing damage for the fitness of flying insects is due to the negligible healing capacity of broken wings, although puzzling findings previously suggested that wings may regrow after complete extirpation (Kammerer, 1907; Werber, 1907, 1911). These findings, however, were also explained by the deformation of dead cuticle material and not a regeneration of living tissue (Kříženecký, 1914). Wing damage in holometabolic animals thus accumulates over the animal's lifetime and is used for estimations of chronological (Allsopp, 1985; Hargrove, 2020; Mueller and Wolf-Mueller, 1993) and physiological age (Burkhard et al., 2002; Hayes et al., 1998).

There is ongoing controversy on the development of wing damage in insects and its dependency on flight activity. Several authors reported an increasing rate of wing damage with increasing lifetime (Foster and Cartar, 2011; Higginson and Barnard, 2004), while others found the opposite (Mueller and Wolf-Mueller, 1993; O'Neill et al., 2015). For example, Mountcastle and Combes (2014) proposed that insect wings with broken tips accrue less additional damage. They argued that frayed and shorter wings are more compliant than intact wings when hitting a solid object and thus the rate of wing wear should decrease with increasing lifetime. Studies on 'lifetime potential' concepts, for example in bumblebees, suggest that flight with damaged wings leads to faster physiological senescence and premature death (Cartar, 1992). Vance (2009) observed an inability of older animals to compensate for wing area loss by an appropriate increase in wing flapping frequency, which implies a loss of fitness. There are experimental findings on male flies that supposedly showed a reduction in longevity when the wings were artificially removed from the body. This result has been attributed to an overuse of leg motion as a result of mating attempts because it was not present in solitary males (Ragland and Sohal, 1973).

The behavioural and fitness consequences of wing area loss for flight are manifold and the animals' compensatory mechanisms remarkable. For example, (i) bumblebees with damaged wings often have unchanged flight behaviours compared with intact conspecifics (Haas and Cartar, 2008), (ii) dragonflies with a missing hindwing are still able to turn, land on a moving object and catch flies, with little difference in locomotor force production compared with intact animals (Kassner et al., 2016), and (iii) butterflies with wing damage still defend territories against intruders with intact wings (Monge-Nájera et al., 1998). The last, however, may be explained by the highly ritualised nature of butterfly fights, in which the intruder usually loses (Davies, 1978). Nevertheless, the loss of wing area typically attenuates flight capacity. Insects with damaged wings fly more slowly than those with intact wings (Combes et al., 2010; Fischer and Kutsch, 2000; Haas and Cartar, 2008; Jantzen and Eisner, 2008; Muijres et al., 2017) and maximum acceleration and manoeuvrability are usually reduced (Combes et al., 2010; Haas and Cartar, 2008; Mountcastle et al., 2016). It has been suggested that this reduction increases the risk of predation (Cartar, 1992; Combes et al., 2010; Dukas and Dukas, 2011; Jantzen and Eisner, 2008; Vance and Roberts, 2014) and social insects such as bees may suffer from reduced performance of wing-damaged foragers (Dukas and Dukas, 2011; Higginson and

Department of Animal Physiology, University of Rostock, 18059 Rostock, Germany.  
<sup>\*</sup>Present address: Institute of Semiconductor Technology, Technische Universität Braunschweig, 38106 Braunschweig, Germany.

<sup>‡</sup>Author for correspondence (fritz.lehmann@uni-rostock.de)

 F.-O.L., 0000-0002-9511-3651

Barnard, 2004; Johnson and Cartar, 2014). Similar results have been reported for small solitary carpenter bees (Rehan and Richards, 2010). In general, wing damage reduces the animal's load-lifting capacity, although neither the shape nor the symmetry of damage seems to be significant (Buchwald and Dudley, 2010; Fernández et al., 2017; Roberts and Cartar, 2015). Data show that insects lose their flight ability if wing area loss exceeds ~33–40% of the initial area (Haas and Cartar, 2008; Ragland and Sohal, 1973). Some four-winged insects may still actively fly with only two wings, i.e. a ~50% reduction in total wing area (Kassner et al., 2016), and butterflies without hindwings produce enough lift for flight but at the cost of lower flight and turning speeds (Jantzen and Eisner, 2008).

To compensate for the loss of wing area, many insects such as moths, bumblebees and dragonflies adapt their wing kinematics to the smaller lift-generating surface, increasing or decreasing wingbeat frequency (Danzer, 1956; Fernández et al., 2012, 2017; Hargrove, 1975; Hedenström et al., 2001; Jantzen and Eisner, 2008; Kassner et al., 2016; Kingsolver, 1999; Muijres et al., 2017; Roberts and Cartar, 2015; Sotavalta, 1952a; Vance and Roberts, 2014) and increasing wingbeat amplitude (Buchwald and Dudley, 2010; Fernández et al., 2017; Johnson and Cartar, 2014; Lyu et al., 2020; Muijres et al., 2017; Vance and Roberts, 2014). While in Diptera the changes in wing beat frequency are thought to result from the reduction in mass load on the mechanical thoracic oscillator (Sotavalta, 1952b), the changes in wingbeat frequency of insects with synchronous flight muscles necessarily result from neural adjustments in muscle contraction (e.g. Wilson and Weis-Fogh, 1962). Besides wingbeat frequency and amplitude, insects also change their wing tip path during upstroke and downstroke and body posture in response to wing wear (Fernández et al., 2012; Lyu et al., 2020; Muijres et al., 2017) that moreover alter aerodynamic force production and moment control around yaw, pitch and roll axes of the insect body.

To investigate the dependency of wing damage on both flight activity and age in an insect, and to estimate the significance of wing area loss for flight capacity, this study experimentally investigated the time evolution and behavioural impact of wing damage in the house fly *Musca domestica*. We scored flight activity throughout the entire lifetime of adult animals, mapped their wing wear at regular intervals and tested the ability of animals with damaged wings to support their body weight in free flight. The statistical analyses suggest that wing area loss in flies follows a logistic function and depends equally on flight activity and age. We also found that the animal's active flight capacity ceases when ~10–34% of total wing area is lost.

## MATERIALS AND METHODS

This study encompasses two experimental approaches: first, an assay with which we determined the progression of wing wear and flight activity in small groups of flies kept in small transparent cylindrical plastic containers (height, 72 mm; diameter, 48 mm; Fig. 1C) with ~130 cm<sup>3</sup> volume (container experiment); and second, a behavioural assay, in which we scored wing wear and the flies' ability to freely fly (free-flight experiment) in a ~2000 times larger mesh flight cage (52×52×93 cm<sup>3</sup>, ~0.25 m<sup>3</sup> volume). Both approaches comprised lifetime measurements (container experiment, total experimental time: 153 days; free-flight experiment, total experimental time: 94 days). If not stated otherwise, all data are given as means±s.d. Data are available through Dryad (Lehmann, 2021).

## Animals

In all experiments, we used house flies *Musca domestica* L. from a laboratory strain obtained from the German Federal Environmental Agency (Fig. 1A,B). The flies were kept under a 12 h:12 h light:dark cycle and supplied *ad libitum* with sugar, powdered milk and water; females had the opportunity for oviposition on a moist medium. Larvae were reared in separate plastic containers, and transferred into plastic tubes after pupation, in which the adults hatched. For experiments, all animals were marked with small amounts of paint on their thorax (Pelikan, Hannover, Germany).

For container experiments, the animals were sorted according to sex, and moved from their hatching container into the experimental container at a median age of 0.5 days, where they were kept until they died. There was no significant difference in transfer age between males and females (Welch two-sample *t*-test,  $P=0.39$ ). We estimated body mass when the flies were ~4.5 days old. Dead flies were replaced by flies of the same age from a control container in order to keep group sizes constant in the experimental containers (see below). We did not collect wing damage data from flies that had been added as a replacement. In total, we tested 72 flies in 18 groups (4 flies per container) and the final number analysed was 27 females and 36 males. Body mass was ~18.6±2.8 mg in females and ~14.1±2.4 mg in males (Fig. 2A). Females were significantly heavier than males (Welch two-sample *t*-test,  $P<0.001$ ). Wing area was also greater in females than in males (Fig. 2B,E) in both experimental approaches, and significantly increased with increasing body mass (Fig. 2C). For free-flight experiments, we placed 10 females and 10 males immediately after hatching into the mesh cage and kept them there until they died. As three flies were accidentally killed during the experimental period, the data in this approach stem from 8 females and 9 males. In this case, dead flies were not replaced.

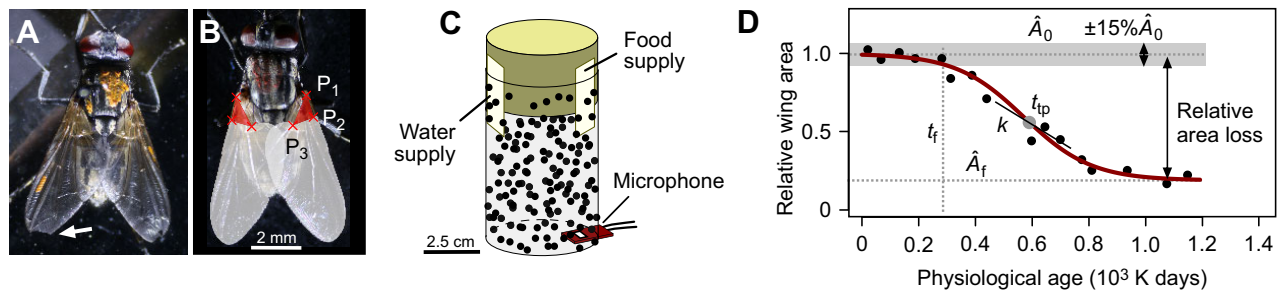

**Fig. 1. Methods and mathematical procedure.** (A) A female house fly, marked by orange paint on the thorax; the arrow points to a local loss of wing membrane at the wing tip. (B) Traced wing masks (white) for area estimations and red area ( $P_1$ – $P_3$ ), which indicates the hinge area and position for wing alignment. (C) Transparent fly container for flight activity measurements with surrounding random dot pattern for visual guidance. A microphone is mounted in a hole at the bottom and paper strips provide water and food. (D) Parameters of the logistic fit model as used for estimations of wing damage development.  $\hat{A}_0$ , normalised initial wing area;  $\hat{A}_f$ , normalised wing area at death;  $k$ , logistic growth rate of the fitted function (not visible; related to slope at the inflexion point, see Eqn 7);  $t_f$ , beginning of wing damage at  $0.85\hat{A}_0$ ; and  $t_{tp}$ , time coordinate of inflexion point of the fitted function. Physiological age is in Kelvin days (K days).

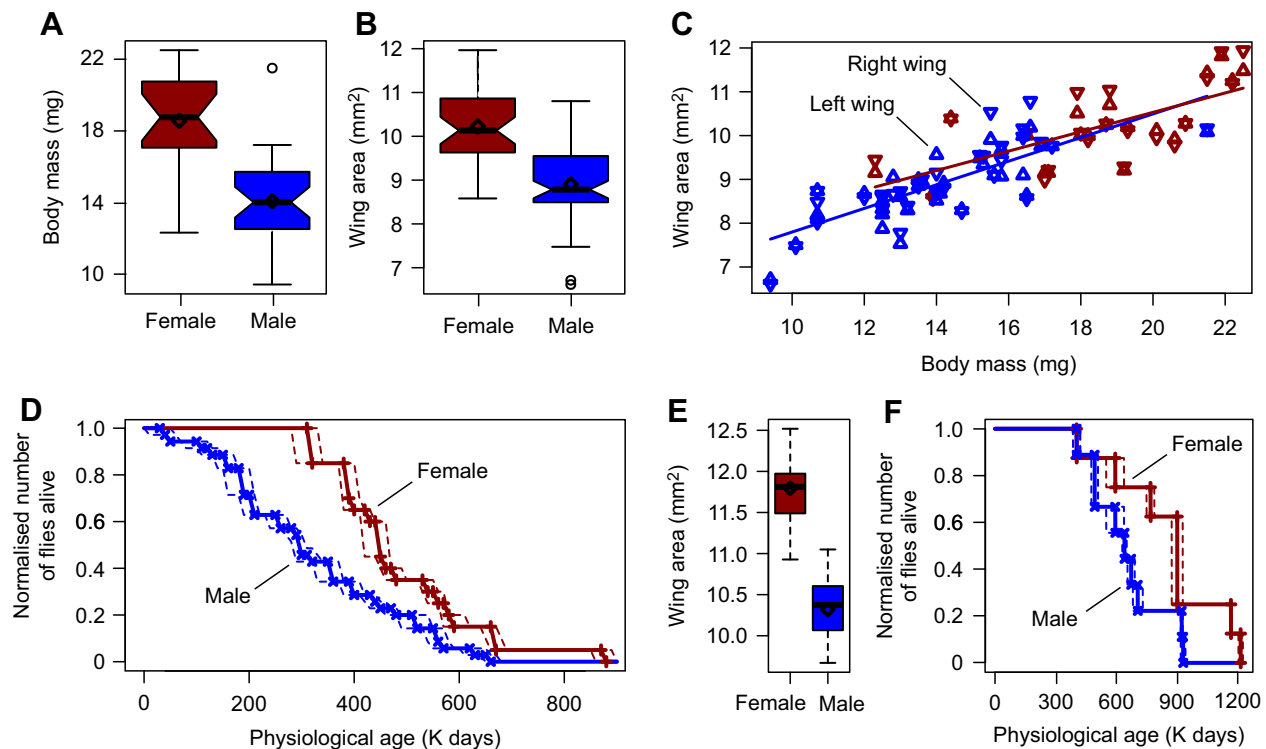

**Fig. 2. Body mass, initial wing area and survival rate of flies.** Initial (A) body mass and (B) wing area of single wings in container experiments. Data are shown as box plots with means (diamond), medians (horizontal bar), quartiles (hinges) and whiskers extending to the most extreme data point no further than 1.5 times the interquartile range away from the box. The notches extend to  $\pm 1.58$  interquartile range divided by  $\sqrt{n}$ , where  $n$  is the number of data points. Outliers are plotted as open circles. (C) Relationship between body mass  $m$  and area of single wings. Lines are linear regression fits ( $A_0 = am + b$ ; females:  $a = 0.2 \text{ mm}^2 \text{ mg}^{-1}$ ,  $b = 6.1 \text{ mm}^2$ ,  $R^2 = 0.48$ ; males:  $a = 0.3 \text{ mm}^2 \text{ mg}^{-1}$ ,  $b = 5.1 \text{ mm}^2$ ,  $R^2 = 0.63$ ). (D) Mortality of flies used for analysis ( $N = 20$  females,  $N = 35$  males) in container experiments (means  $\pm$  range). (E) Wing area and (F) mortality of flies in free-flight experiments ( $N = 8$  females,  $N = 9$  males).

### Physiological and chronological age

For age-related phenomena, the physiological age can be more relevant than the chronological age (Burkhard et al., 2002; Hayes et al., 1998). We thus used physiological age in this study and estimated its value in degree days (Kelvin days, K days) above a threshold temperature of  $11^\circ\text{C}$  (Skovgård and Nachman, 2004). Temperature was continuously scored and eventually averaged for each 12 h light or dark period. Missing values were interpolated. Fly hatching was monitored twice a day. Physiological and chronological age are linearly correlated with a Pearson's correlation coefficient of  $>0.99$ . Mean linear regression slope between chronological and physiological age was  $15 \pm 3$  K and varied between  $\sim 10$  K and 18 K (container experiments). The slope in the free-flight experiment was  $\sim 13$  K. For correlations between physiological and chronological age, see Supplementary Materials and Methods 1. The theoretical maximum precision in physiological age estimation was 6.75 K days and mean ambient temperature for all measurements was  $\sim 24.5^\circ\text{C}$ .

### Container experiment setup

The experimental setup consisted of nine cylindrical plastic containers that were mounted in  $3 \times 3$  holes of an acrylic glass rack. All containers except for the water supply were surrounded by a printed random dot visual environment and equipped with an electret microphone at the bottom (Fig. 1C). Other containers served as the water supply, reference for sound recording (empty container) and fly reservoir to replace flies that died in one of the six experimental containers. All containers were closed with foam stoppers. The rack was illuminated from above by two fluorescent lamps (16 W, colour

temperature 3400 K) on a 12 h:12 h day:night cycle (07:00–19:00 h). Measured illuminance inside the containers varied between 380 and 840 lx. We monitored ambient temperature (mean  $24.7 \pm 2.8^\circ\text{C}$ ) and relative humidity (mean  $38 \pm 6\%$ ) every 5 min with a data logger (BL-30, Trotec GmbH, Heinsberg, Germany).

To monitor the animals' flight activity inside the containers, we recorded the flight sound from seven microphones on the rack using a multi-channel audio interface (Tascam US-16x08, TEAC Europe GmbH, Wiesbaden-Erbenheim, Germany). Sound was sampled at 44.1 kHz, bandpass filtered, and subsequently down-sampled to 8.0 kHz (MediaHuman audio converter; see Supplementary Materials and Methods 2 and 3 for further details). We determined flight activity from the difference between the audio signal inside containers with flies and the sound reference container without flies using custom-written Python script. The software filtered (6th order Butterworth bandpass, 100 Hz to 1000 Hz) the signals, converted them to absolute values (rectification), and subsequently smoothed them with a 0.01 s boxcar averaging filter. Flight was counted when the flight signal amplitude was at least twice the sound amplitude of the control container. Processing of data ( $\sim 1.3$  terabytes, TB) was performed on a node of the Skylake partition of Irene supercomputer (48 CPU cores, 180 GB RAM; TGCC at Bruyères-le-Châtel, France). Six audio tracks were simultaneously processed and total processing time was approximately 3 h. To exclude short locomotor hops, we only considered flights with a minimum duration of 0.03 s, i.e.  $\sim 5$  wingbeats at  $\sim 170$  Hz flapping frequency. To link the audio signal to flight activity, we conducted control experiments using high-speed video and sound recording. These controls showed that, on



average, a flight sound (flight bout) was due to flight of one out of the four flies inside each container (see Supplementary Materials and Methods 3 for further details). Normalised flight activity for a group of four flies,  $\hat{t}_{\text{flight}}$ , during a recorded time span  $\Delta t_{\text{rec}}$  was calculated from the ratio between flight  $\Delta t_{\text{flight}}$  and recording time  $\Delta t_{\text{rec}}$ . This measure is expressed by the following equation:

$$\hat{t}_{\text{flight}} = \frac{\Delta t_{\text{flight}}}{\Delta t_{\text{rec}}}. \quad (1)$$

For estimation of flight activity,  $\Delta t_{\text{rec}}$  was  $\sim 12$  h and for circadian rhythm analyses it was  $\sim 15$  min. We interpolated flight activity data that were missed during wing area measurements, noisy audio signalling or other technical problems.

One of our initial ideas was the reconstruction of wing beat frequency from the sound recordings during flight. However, simultaneous high-speed video analysis on wing motion and sound recording revealed that the major frequency component obtained from fast Fourier analysis did not reliably map wing flapping motion. Possible explanations include sound interference between the two beating wings, sound being reflected within the container and Doppler effects. We thus excluded the frequency analysis from this study.

### Free-flight experiment setup

To score the relationship between wing damage and locomotor capacity, flies were kept and tested in the mesh flight cage under similar environmental conditions to those used for the container experiments. Mean illuminance inside the cage was  $\sim 350$  lx at the bottom and 42,000 lx at the top, mean ambient temperature was  $24.1 \pm 0.8^\circ\text{C}$ , and relative humidity was  $41 \pm 7\%$ . Each time we removed the flies from the cage in order to take photographs of the wings, we tested their ability to support their body weight in free flight over a flight distance of 26 cm by releasing them in the middle of the cage. Weight-supporting active flight was considered when the altitude of the landing site was equal to or above the altitude of the start post.

### Estimations of wing area and damage

In both experimental approaches, we estimated wing wear on average 3 times a week (Monday, Wednesday, Friday) throughout the animals' lifetime. The animals were removed from their housing, cold-anaesthetised at  $\sim 4^\circ\text{C}$  and placed under a stereomicroscope that was equipped with a camera (Canon EOS 750D, Canon, Tokyo, Japan). We traced the wing planforms using Fiji (Schindelin et al., 2012) and stored them as binary wing images (wing mask). For estimation of total area and alignment during post-processing, we manually marked three positions for reference in all left and right wings on the photos (P<sub>1</sub>–P<sub>3</sub>, red area in Fig. 1B) and used them to align the wing masks using custom-written scripts in R and Python. Wing root and alula could not be reliably traced. Therefore, we only traced the area distal to the line between P<sub>2</sub> and P<sub>3</sub> (white area in Fig. 1B; see Supplementary Materials and Methods 4 for further details). For estimations of the 2nd moment of wing area, we added an averaged sex-specific area to represent the wing proximal to the line between P<sub>2</sub> and P<sub>3</sub> (excluding the alula), and used mean root positions and longitudinal axes determined from the intact wings in all cases, i.e. in both intact and damaged wings (see Supplementary Materials and Methods 5 for further details). Wing damage is the relative wing area of a single wing  $\hat{A}$  expressed by:

$$\hat{A} = \frac{A}{A_0}, \quad (2)$$

where  $A$  is the sum of area-covering image pixels and  $A_0$  is the initial wing area at the beginning of the experiment (traced area only, white in Fig. 1B). As left and right wings mostly have different damage and thus area, we used a modified version of Ellington's (1984) theoretical derivative for 2nd moment of total wing area for a single wing (see Supplementary Materials and Methods 6 for further details):

$$A_2 = \int_{r=0}^R c(r)r^2 dr, \quad (3)$$

where  $R$  is the wing length,  $r$  is the position along the axis from wing root to wing tip and  $c(r)$  is the wing chord at position  $r$ . Total area of both wings ( $S$ ) and body mass-specific 2nd moment of area of both wings ( $S_2^*$ ) are derived as the sum of both wings. Total normalised wing area ( $\hat{S}$ ) is the sum of left and right wing area divided by the sum of both initial areas. The relative right-minus-left difference of total wing area is:

$$\Delta \hat{S} = \frac{\hat{A}_{\text{right}} - \hat{A}_{\text{left}}}{\hat{A}_{\text{right}} + \hat{A}_{\text{left}}} \quad (4)$$

and the difference of the 2nd moment of area is:

$$\Delta S_2^* = \frac{A_{2,\text{right}} - A_{2,\text{left}}}{A_{2,\text{right}} + A_{2,\text{left}}}. \quad (5)$$

Both parameters are normalised by the sum of both wings and can be used as a measure for damage asymmetry. A similar description of asymmetry has previously been used (Johnson and Cartar, 2014).

### Progression of wing damage

Previous studies suggested that wing area loss exponentially increases (Higginson and Gilbert, 2004) or asymptotically saturates (Mountcastle and Combes, 2014) with increasing lifetime of an insect. Our wing area data suggest a combination of both exponential relationships that is best described by a four-parameter logistic function:

$$\hat{A}(t) = \frac{\hat{A}_f - \hat{A}_0}{1 + e^{k(t_p - t)}} + \hat{A}_0, \quad (6)$$

where  $\hat{A}_0 = 1$  is the normalised initial area,  $\hat{A}_f$  is the final normalised wing area at the animal's death,  $t_p$  is the  $x$ -coordinate of the inflexion point of the logistic function at 50% of the final area loss  $\hat{A} = \frac{1}{2}(\hat{A}_0 + \hat{A}_f)$ ,  $t$  is time and  $k$  is the logistic growth rate, defined as:

$$k = 4 \frac{d\hat{A}/dt(t_p)}{\hat{A}_f - \hat{A}_0}. \quad (7)$$

For time  $t$  in Eqns 4 and 5, we either inserted physiological age or cumulative activity. Cumulative activity was calculated from flight activity bouts in each fly group, divided by the number of individuals in the container. This procedure was developed according to control experiments (see Supplementary Materials and Methods 7). We fitted the model parameters using Gauss–Newton or Levenberg–Marquardt algorithms depending on which worked best. We defined the beginning of wing area loss ( $t_f$ ; Fig. 1D) as the value of the logistic function at which wing area falls below 0.85 initial wing area. This threshold was derived according to maximum measurement noise in all flies and was  $\pm \sim 15\%$  of initial wing area.

### Statistics

#### General concept

Our statistical analyses cover approaches on two topics of this study. The first topic was the relationship between wing area loss, physiological age and flight activity (container experiments) and the



second topic was the relationship between wing area loss and flight capacity (free-flight experiments). The statistics on the first topic consist of three steps: (i) a pre-test procedure using Pearson correlation, (ii) a principal component analysis (PCA) with Kolmogorov–Smirnov test, and (iii) a comparison of model parameter variability to assess the significance of physiological age and flight activity on wing area. The statistics on the second topic encompassed PCA only.

### Correlation of a combined predictor

To pre-evaluate any relationship between wing area loss and the two predictors (physiological age and cumulative flight activity), we tested whether  $t_f$  values at  $0.85\hat{A}_0$  derived from the logistic fits are clustered compared with a reference distribution. A clustered value would suggest that wing area loss starts at a specific combination of age and activity during the animals' lifetime. A limitation of this approach is that it excludes all wings for which we could not conduct a logistic fit, for example all wings with less than 15% area loss (see above). Area loss of less than 15% prevented fitting a curve in ~80% female and ~35% male wings. For analysis, we reduced the two dimensions age and activity to one dimension using PCA. The magnitude of the first principal component (PC1) for all area measurements in all flies was used as a reference. As the units of the two predictors are different (age, K days; activity, h), age and activity were  $z$ -transformed by subtracting means and normalising to standard deviation before PCA. The reference distribution takes into account the various lifespans because the number of age and activity data points decreases with increasing age and activity in the tested flies (Fig. 2D,F). In other words: it considers the changes in local density of PC1-values due to the decreasing number of flies alive with increasing time. To directly compare reference values along PC1 with  $t_f$  values from the logistic fits, we  $z$ -transformed  $t_f$  values for age and activity using the means and standard deviations of the reference dataset, copied the PC1 eigenvector of the reference PCA into the  $t_f$  coordinate system instead of performing a new PCA, and estimated PC1  $t_f$  values along the eigenvector. To test for statistical differences between the reference and  $t_f$  distributions along PC1, we used a Kolmogorov–Smirnov test with Bonferroni correction for multiple testing.

### Comparison of model parameters between dimensions

PCA cannot provide evidence for the strength of each predictor for wing damage. We approached this problem by comparing the variance of the beginning of wing damage ( $t_f$ ) between both predictors. The  $t_f$  values were derived from the logistic wing models fitted according to age and activity, respectively. If the models are more uniform along one dimension, this dimension would appear to be a better predictor of wing damage. As the two predictors possess different scales, we transformed the two sets of  $t_f$  values using their medians for centring them on zero and normalising their scale. After transformation, data variability was relative to the original scale and the variance of both datasets was compared by the Fligner–Killeen test on homogeneity of variances. The above approach is limited to those wings for which a logistic curve could be fitted successfully (~15% for activity as a predictor and 20% for age as a predictor for female wing models, ~50% for male models in both cases). This excludes wings with less than 15% wing area loss (which is the case for 80% of female wings and 35% of male wings) and wings where the fitting process was unsuccessful for other reasons. An alternative approach that allowed us to include all measured data such as multiple linear model regression analysis was not suitable because of the logistic development in wing area loss.

## RESULTS

### Life expectancy

In the container experiment, females reached physiological (chronological) ages of between 310 and 880 K days (17.5 and 59.5 days); mean age was  $480 \pm 140$  K days ( $32.0 \pm 11.5$  days; Fig. 2D). Females lived ~1.5 times longer than males (two sample  $t$ -test; physiological age,  $P < 0.001$ ; chronological age,  $P < 0.01$ ), which reached maximum ages of between 30 and 660 K days (2.0 and 49.5 days); mean age of these flies was  $320 \pm 170$  K days ( $22 \pm 12$  days; Fig. 2D). In the free-flight experiments, female flies lived 400–1210 K days (31 to 92.5 days) with a mean of  $860 \pm 270$  K days ( $65.5 \pm 20.5$  days; Fig. 2F). In contrast to the container experiment, the life expectancy of males in the free-flight cage was relatively shorter but not significantly different from that of females (two-sample  $t$ -test,  $P > 0.09$  for both ages) and ranged from 400 to 930 K days, with a mean age of  $650 \pm 180$  K days (31 to 70.5 days;  $50.0 \pm 13.5$  days). In sum, flies in the free-flight experiment tended to live twice as long as those in the container experiment.

### Fly activity in containers

In total, we recorded 7,776,670 flights of which ~30% were measured in containers with females and ~70% with males (Fig. 3). Fig. 3A shows frequency and length of flight bouts and how they were distributed over one day. Mean duration of flight bouts in females was  $0.20 \pm 0.23$  s, significantly longer than that in males ( $0.17 \pm 0.17$  s; Wilcoxon rank sum test with continuity correction,  $P < 0.001$ ). Fig. 3B highlights that ~75% of all flight sequences were equal to or shorter

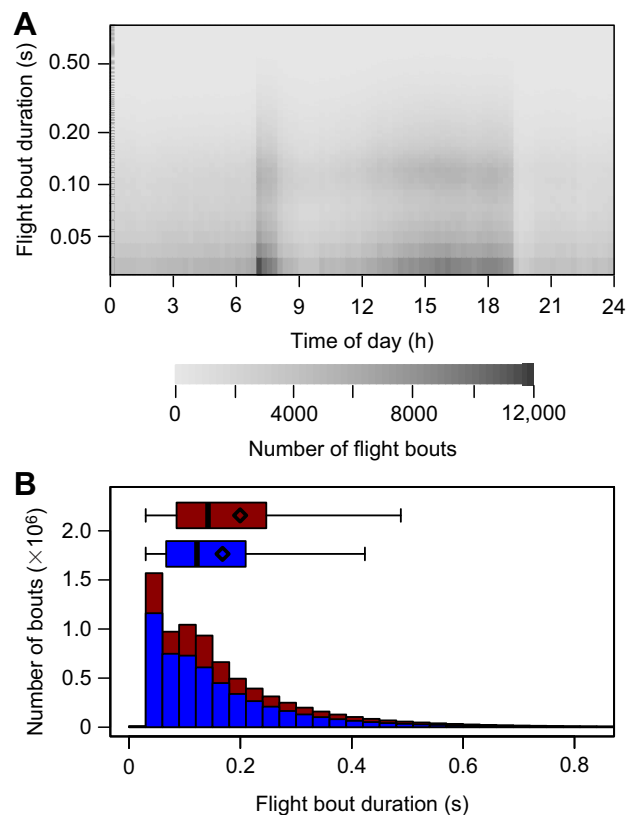

**Fig. 3. Duration of flight sequences inside the flight containers.**

(A) Number and length of single flights over the course of the day. Numbers are plotted as greyscale. (B) Histogram of flights according to the duration of flight bouts and sex (red, female; blue, male). Data cover ~99% of all recorded activity bouts and box plots show medians (solid lines) and means (diamonds). See also legend to Fig. 2 for box plot explanation (outliers not shown).

than  $\sim 200$  ms (females,  $\sim 74.8\%$ ; males,  $\sim 74.6\%$ ). The 99% quantiles in flight activity bout durations thus yield 0.92 s in females and 0.79 s in males. The ethogram in Fig. 4 shows that activity bouts were not equally spaced in time, owing to the animals' circadian rhythm (Fig. 4A). Flight activity during the light period was significantly higher than activity during the dark period (paired  $t$ -test,  $P < 0.001$ ; Fig. 4B). The data also show that males were significantly more active than females during both the light (females,  $\hat{t}_{\text{flight}} = 0.054 \pm 0.019$ ; males,  $\hat{t}_{\text{flight}} = 0.093 \pm 0.037$ ) and dark period (females  $\hat{t}_{\text{flight}} = 0.007 \pm 0.005$ ; males,  $\hat{t}_{\text{flight}} = 0.034 \pm 0.010$ ; Welch two-sample  $t$ -test,  $P < 0.05$ ; Fig. 4C).

### Pattern and progression of wing damage

Although the two experimental approaches (container, free flight) provided separate datasets for wing damage, we summarise these findings in this section. Fig. 5 shows two examples of wing damage

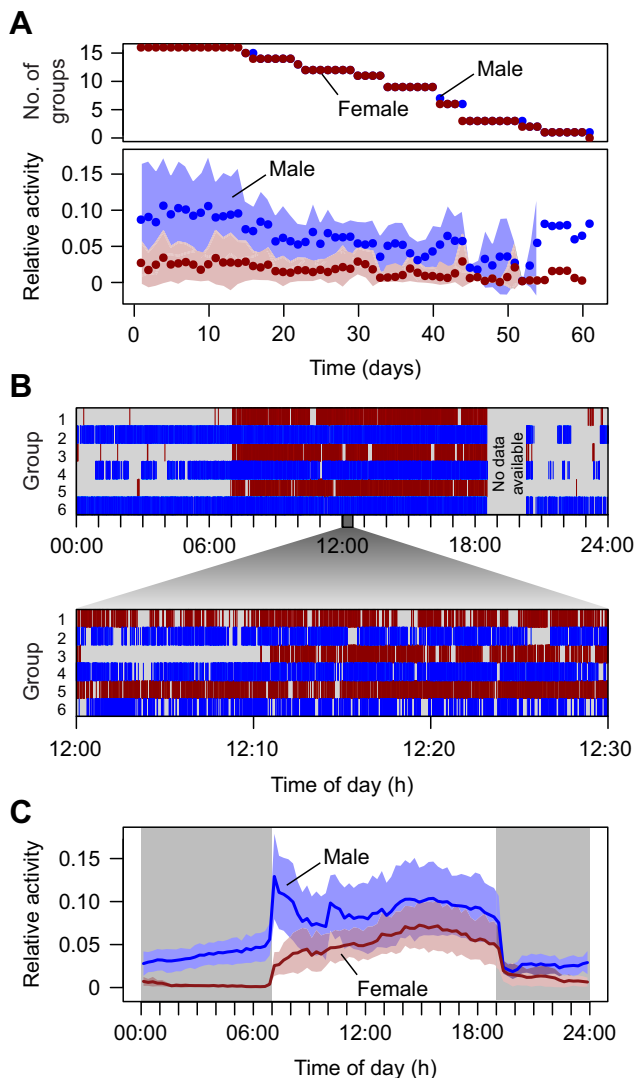

**Fig. 4. Ethogram of flight activity in containers.** (A) Bottom: mean relative activity (ratio of activity to total time) after interpolation of all tested fly groups plotted against time (shaded areas are standard deviation). Top: number of fly groups ( $N=7$  containers with females,  $N=9$  containers with males). (B) Flight activity (vertical lines) of 6 groups of approximately 8 day old flies scored over 24 h (top), with a close up at one 30 min interval (bottom). (C) Means  $\pm$  s.d. of circadian activity. Flight activity ( $N=5760$  data for each sex) was estimated in 15 min time segments (no interpolated data). Grey area is night-time without illumination. Female groups are plotted in red and male groups in blue.

for six observations of two different flies for container (male; Fig. 5B) and free-flight experiments (female; Fig. 5A). In total, we were able to score wing damage in 534 and 656 photos in container experiments and 190 and 157 photos in free-flight experiments of females and males, respectively. Wing wear typically started in both sexes by a loss of wing area at the wing tip or the distal parts of membrane area at the trailing wing edge. At this initial state, we did not observe any area loss at the leading edge in either sex. With increasing age, the wings also broke at the stiff leading edge and typically lost all distal areas. Thus, wing length decreased with increasing age and flight activity.

As mentioned in Materials and Methods, we used a logistic fit function to describe wing area loss in a subset of all data. The examples of this analysis show fast (Fig. 6A–C) and slow (Fig. 6D,E) damage progress. In general, the results of the logistic fit suggest that wing area loss occurs suddenly and quickly progresses with age and activity (Table 1). As already mentioned, the analysis condition excluded single wings (container experiment) and sets of wings of individual animals (free-flight experiment) that experienced less than 15% wing area loss, i.e. 33 female and 24 male wings in container experiments and 2 females and 1 male in free-flight experiments. These values correspond to  $\sim 83\%$  and  $\sim 34\%$  of the tested female and male wings in container experiments and  $\sim 25\%$  of females and  $\sim 11\%$  of males in free-flight experiments, respectively. For the predictors physiological age and cumulative activity, we eventually derived data from 7 and 6 female wings, and 37 and 37 male wings, respectively, which is 40% of all tested wings in container experiments. For the 6 females and 8 males available for fitting a curve in the free-flight experiment, one model per fly could be fitted successfully ( $\sim 82\%$  of all flies).

We used these models as the basis for further analysis. In the container experiment, we found that wings lost on average 69% of their initial area within the flies' lifetime ( $\hat{A}_T = 0.31 \pm 0.23$  initial area). Area loss in single animals was widely scattered, ranging from  $\sim 100\%$  (complete area loss) to a minimum of  $\sim 15\%$  loss of initial area (container experiments) at death. We obtained similar data for

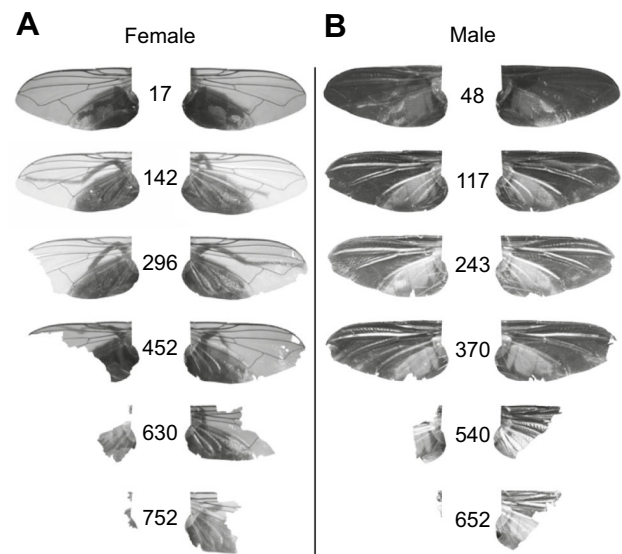

**Fig. 5. Loss of wing area in the two experimental approaches for a single fly each at different physiological ages.** Loss of wing area scored as a function of age (K days) in (A) free flight (female) and (B) container experiments (male). In total, throughout the animals' lifetime, we determined wing area for 594 left and 596 right wing photos in container experiments and 350 left and 348 right wing photos in free-flight experiments.

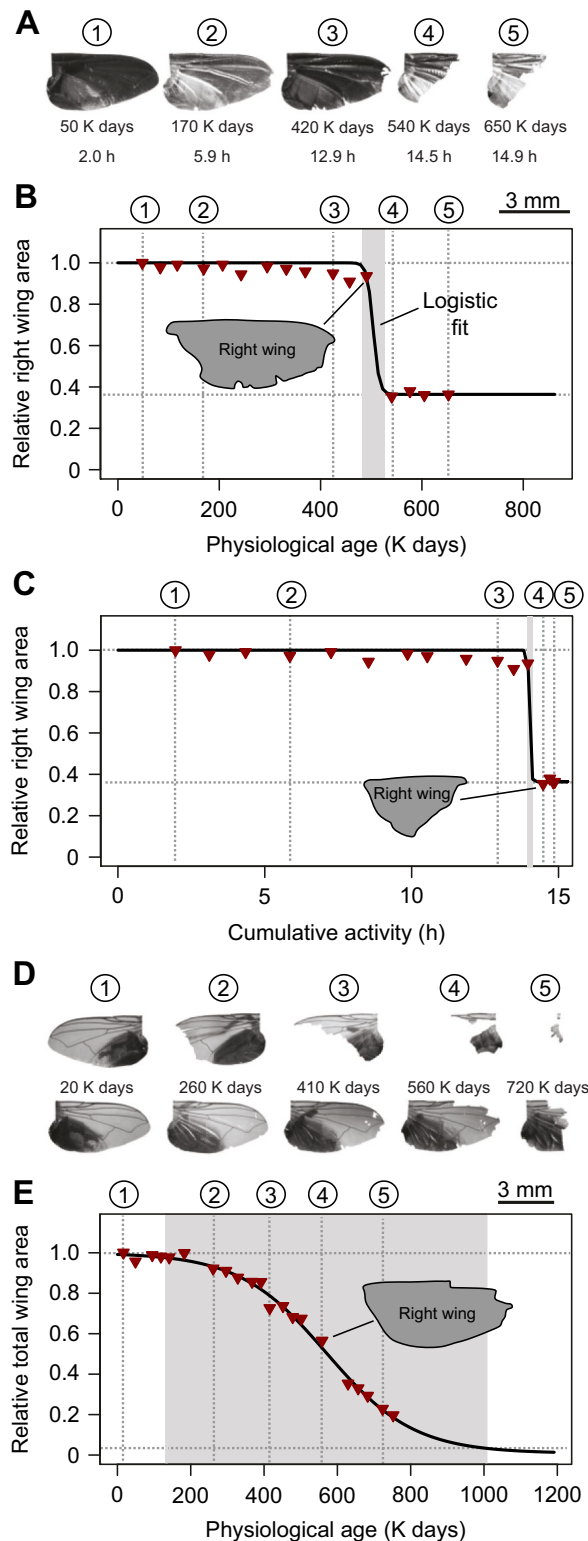

**Fig. 6. Development of wing area loss in single house flies.** Wing area was normalised to initial wing area after hatching. (A) Progress in area degradation in the right wing of a male in the container experiment. Values are physiological age (top) and flight activity (bottom). (B,C) Relative wing area (red) of the animal in A plotted against the two predictors (B, physiological age; C, flight activity) and logistic fit to the data (black). (D,E) Loss of wing area in both wings of a female tested in free-flight experiments (D), and relative wing area plotted against physiological age (E). Grey shaded areas and dashed horizontal lines indicate the progress of wing damage.

flies in the flight cage (free-flight experiments) in which the mean sum of left and right wing area at death (Eqn 4) was  $\sim 27\%$  of the initial area ( $\bar{S}_f = 0.27 \pm 0.35$ ) and ranged from  $\sim 100\%$  to  $\sim 16\%$  loss of initial area. The time at which the flies lost 50% of their wing area loss, i.e. the inflexion point of the logistic fit function, was  $\sim 258 \pm 165$  K days for physiological age and  $\sim 6.72 \pm 5.13$  h for flight activity (container experiments), compared with  $\sim 614 \pm 266$  K days in free-flight experiments (Table 1). The data in Table 1 also highlight that flies in small containers lost wing area  $\sim 20$  times more rapidly compared with their relatives in the larger flight cage. We found that the rate of wing area loss at the inflexion point was  $\sim -31.4 (\pm 36.8) \times 10^{-3} \text{ K}^{-1} \text{ day}^{-1}$  for physiological age and  $\sim -2.68 \pm 4.46 \text{ h}^{-1}$  for accumulative flight activity, compared with  $\sim -1.59 (\pm 1.05) \times 10^{-3} \text{ K}^{-1} \text{ day}^{-1}$  in free-flight experiments. Logistic growth rates were broadly independent of the onset of wing damage (Fig. 1D) in both container (linear regression, flight activity versus  $k$ ;  $R^2 < 0.16$ ) and free-flight experiments [flight activity versus  $k$ ,  $R^2 < 0.01$ ; where  $k$  is the logistic growth rate (see Eqns 6,7)].

### Flight activity and wing damage

Wing damage may depend on age or activity, a combination of the two, or neither. We approached this question by scoring the variance of the relationship between age and activity in each animal. Without variance, age and activity would be indistinguishable. This was checked using a linear interaction model with activity as outcome variable, age as covariate and individual fly identity as explanatory factor (Fig. 7A). We estimated regression slopes and intercepts of 53 animals and found a mean slope of  $\sim 0.020 \pm 0.009 \text{ h K}^{-1} \text{ day}^{-1}$  for all flies. The slope varied between  $\sim 0.005 \text{ h K}^{-1} \text{ day}^{-1}$  (Fig. 7A, yellow) and  $0.042 \text{ h K}^{-1} \text{ day}^{-1}$  in single animals (Fig. 7A, cyan). The mean regression intercept was  $\sim 0.21 \pm 0.71 \text{ h}$  and close to zero, with a variability ranging from  $-1.36$  to  $2.07 \text{ h}$ . Age, individual fly identity and their interaction were significant model terms, suggesting that both slopes and intercepts were generally different among flies ( $P < 0.001$ ). Pearson's correlation coefficient on pooled flies was  $\sim 0.71$  (625 data points,  $N=20$  females,  $N=35$  males) and smaller than the coefficients for single animals, which ranged from  $\sim 0.97$  to  $\sim 1.0$ .

Firstly, we combined the two predictors and analysed to what degree this one-dimensional combination is correlated with wing damage. Because of the elevated degree of collinearity between the two predictors, this approach allowed us to analyse dependencies regardless of whether the two predictors could be disentangled. PCA on the combined predictors was done on 1250 data points of which 558 were recorded in females and 692 in males. The lower and upper quartiles of physiological age range from 120 to 370 K days in females and from 80 to 290 K days in males, and flight activity from 0.92 to 3.99 h and from 1.96 to 8.53 h, respectively. The first principal component (PC1) explained  $\sim 86\%$  of the data variance. Fig. 7B shows that after  $z$ -transformation, approximately 50% of PC1 values were distributed between  $-1.13$  and  $0.57$  in females and between  $-1.08$  and  $1.09$  in males. Calculations further yielded  $t_f = 450 \pm 60$  K days and  $4.68 \pm 1.13$  h in females, and  $210 \pm 130$  K days and  $6.32 \pm 3.88$  h in males, respectively. After projecting these values into PCA space,  $\sim 50\%$  of PC1 varied between 0.69 and 1.50, and  $-0.82$  and 1.07 in females and males, respectively. We found no significant difference between the reference distribution and the distribution of  $t_f$  in pooled flies ( $P=0.172$ ). This result, however, was sex specific because in females the difference was significant ( $P < 0.05$ ) while in males it was not ( $P=1.00$ ). We also found that females and males differed in the reference distribution ( $P < 0.05$ ) but not in the distribution of  $t_f$  ( $P=0.2$ , Bonferroni correction,  $N=5$  tests).



**Table 1. Statistics of logistic fits to wing damage data**

| Experiment  | Time     | Sex  | $\hat{A}_f$ | $t_{ip}$       | $t_f$            | Slope at $t_{ip}$                                             | $N$ | $N_{data}$ | $P_{succ}$ |
|-------------|----------|------|-------------|----------------|------------------|---------------------------------------------------------------|-----|------------|------------|
| Container   | Age      | f, m | 0.31±0.23   | 258±165 K days | 230±180 K days   | -31.4±36.8 10 <sup>-3</sup> K <sup>-1</sup> day <sup>-1</sup> | 43  | 521        | 40%        |
| Container   | Activity | f, m | 0.31±0.23   | 6.72±5.13 h    | 5.99±4.18 h      | -2.68±4.46 h <sup>-1</sup>                                    | 43  | 515        | 39%        |
| Free flight | Age      | f, m | 0.27±0.35   | 614±266 K days | 486±214 K days   | -1.59±1.05 10 <sup>-3</sup> K <sup>-1</sup> day <sup>-1</sup> | 14  | 263        | 82%        |
| Container   | Age      | f    | 0.27±0.32   | 405±208 K days | 333±348 K days   | -33.2±39.2 10 <sup>-3</sup> K <sup>-1</sup> day <sup>-1</sup> | 7   | 109        | 18%        |
| Container   | Activity | f    | 0.31±0.33   | 3.95±2.34 h    | 3.22±3.69 h      | -4.31±7.97 h <sup>-1</sup>                                    | 6   | 89         | 15%        |
| Free flight | Age      | f    | 0.14±0.34   | 723±302 K days | 538±264 K days   | -1.55±0.97 10 <sup>-3</sup> K <sup>-1</sup> day <sup>-1</sup> | 6   | 122        | 75%        |
| Container   | Age      | m    | 0.31±0.22   | 230±142 K days | 210±126 K days   | -31.1±36.9 10 <sup>-3</sup> K <sup>-1</sup> day <sup>-1</sup> | 36  | 412        | 53%        |
| Container   | Activity | m    | 0.31±0.21   | 7.18±5.34 h    | 6.44±4.13 K days | -2.42±3.72 h <sup>-1</sup>                                    | 37  | 426        | 53%        |
| Free flight | Age      | m    | 0.37±0.33   | 532±220 K days | 447±176 K days   | -1.61±1.18 10 <sup>-3</sup> K <sup>-1</sup> day <sup>-1</sup> | 8   | 141        | 89%        |

Initial wing area  $A_0$  was always set to 1.0.  $\hat{A}_f$ , wing area at death normalised to  $A_0$ ;  $t_{ip}$ , physiological age or cumulative activity at inflexion point;  $t_f$ , age or activity at 0.85 $A_0$ ;  $N$ , number of tested models;  $N_{data}$ , total number of data points used in statistics;  $P_{succ}$ , percentage of successful logistic fits to the tested models.

Secondly, we tested the two predictors as separate variables by comparing the relative variability of  $t_f$  for age and activity (see Materials and Methods). We found that the median of model deviance divided by degrees of freedom was  $1.15 \times 10^{-3}$  for physiological age ( $N=44$  wings) and  $1.14 \times 10^{-3}$  for cumulative activity ( $N=43$  wings). These values were not significantly different (two-sided two-sample Kolmogorov–Smirnov test,  $P \approx 0.89$ ). This result suggests that wing damage might depend more on age than activity or vice versa if variability of model parameters is different for the two predictors, because the modelling did not obviously work better along one dimension than the other. We thus compared the relative variability of  $t_f$  between predictors and found no significant difference between the two values ( $P=0.807$ , Fligner–Killeen test). This means that wing damage in the subset of

successfully modelled wings cannot be attributed to a single predictor.

### Flight ability and wing damage

Fig. 8 shows how wing area loss developed in house flies that lived in the large flight cage (free-flight experiment; analysis for this experiment was done at the animal level). These data potentially link wing damage to the animals' free-flight capacity. According to quasi-steady aerodynamic theory (see Discussion), lift production depends on wing area and increases with the wings' 2nd moment of area (Weis-Fogh, 1973). In general, our data show that normalised wing area [linear regression,  $\hat{S}(\theta) = a\theta + b$ ;  $a = -1.22 \times 10^{-4} \text{ K}^{-1} \text{ day}^{-1}$ ,  $b = 0.96$ ,  $R^2=0.05$ ,  $P_{slope}<0.01$ ,  $N=347$ ; Fig. 8A] and mass-specific 2nd moment of area [linear regression,  $S_2^*(\theta) = -5.0 \times 10^{-3} \text{ K}^{-1} \text{ day}^{-1} \theta + 33.4 \text{ mm}^4 \text{ mg}^{-1}$ ,  $R^2=0.03$ ,  $P_{slope}<0.01$ ; Fig. 8B] decrease with increasing age ( $\theta$ ). In most flies, the same also held for normalised right minus left differences of these measures (Fig. 8C,E). Fig. 8D highlights the linear relationship [linear regression,  $S_2^*(\hat{S}) = a\hat{S} + b$ ;  $a = 48.39 \text{ mm}^4 \text{ mg}^{-1}$ ,  $b = -12.51 \text{ mm}^4 \text{ mg}^{-1}$ ,  $R^2=0.85$ ,  $P_{slope}<0.001$ ] between wing area and mass-specific 2nd moment of area – flies with wing damage thus suffer from simultaneous changes in lifting-surface and wing aspect ratio with increasing age. The relative right minus left difference in wing area is largely independent of total normalised wing area until area drops below a threshold of  $\sim 0.8$  area (Fig. 8F).

Free-flight performance was sorted into only two categories ('flight', 'non-flight'). We scored wing area for 347 out of 351 flight trials (192 trials,  $N=8$  females; 159 trials,  $N=9$  males) that split into 308 'flight' and 43 'non-flight' scores (Fig. 9). Fig. 9A shows that the age distribution of flying flies (median:  $\sim 370$  K days) is significantly different from the age distribution (median:  $\sim 560$  K days) of non-flying flies (two-sided two-sample Kolmogorov–Smirnov test,  $P<0.001$ , Bonferroni-corrected for 6 tests,  $N=351$ ). The same holds for normalised wing area and mass-specific 2nd moment of area in both categories (medians:  $\sim 0.97$  versus  $\sim 0.63$ , Fig. 9C;  $33.1$  versus  $19.9 \text{ mm}^4 \text{ mg}^{-1}$ , Fig. 9D; one-sided two-sample Kolmogorov–Smirnov test,  $P<0.001$ , Bonferroni-corrected for 6 tests,  $N=347$ ). The reverse applies to absolute normalised differences of both parameters (medians:  $\sim 0.01$  versus  $\sim 0.41$ , Fig. 9E;  $0.02$  versus  $0.64$ , Fig. 9F,  $P<0.001$ ). Similar to the analysis of the container experiment, we calculated the PC1 as a predictor for wing area loss using PCA on  $z$ -transformed normalised wing area, body mass-specific 2nd moment of area and absolute relative differences. PC1 accounted for 88% of the variance and medians were  $-0.78$  (flight) and  $3.43$  (non-flight; Fig. 9B). We found that flight and non-flight distributions of PC1 were significantly different (two-sided Kolmogorov–Smirnov test with Bonferroni correction,  $P<0.001$ ,  $N=347$ ).

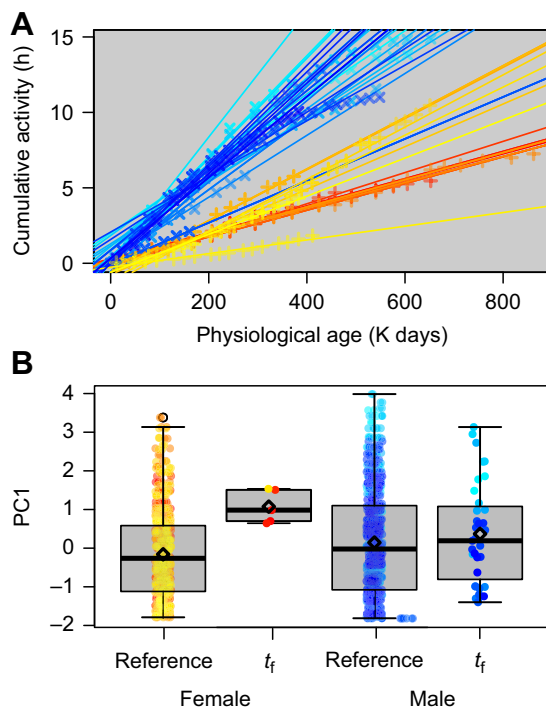

**Fig. 7. Flight activity and age in females and males.** (A) Relationship between accumulated flight activity and physiological age in container experiments. Individual flies are plotted in colour, with females plotted by yellow–red upright crosses and males by cyan–blue tilted/inclined crosses. Lines are linear regression fits to the data. (B) Principal component analysis (PCA). Data show box plots with superimposed first principal component (PC1) data of reference (left side) and  $t_f$  (right side) for females and males, respectively. Flies are colour coded as shown in A. See Materials and Methods for more detailed explanations.

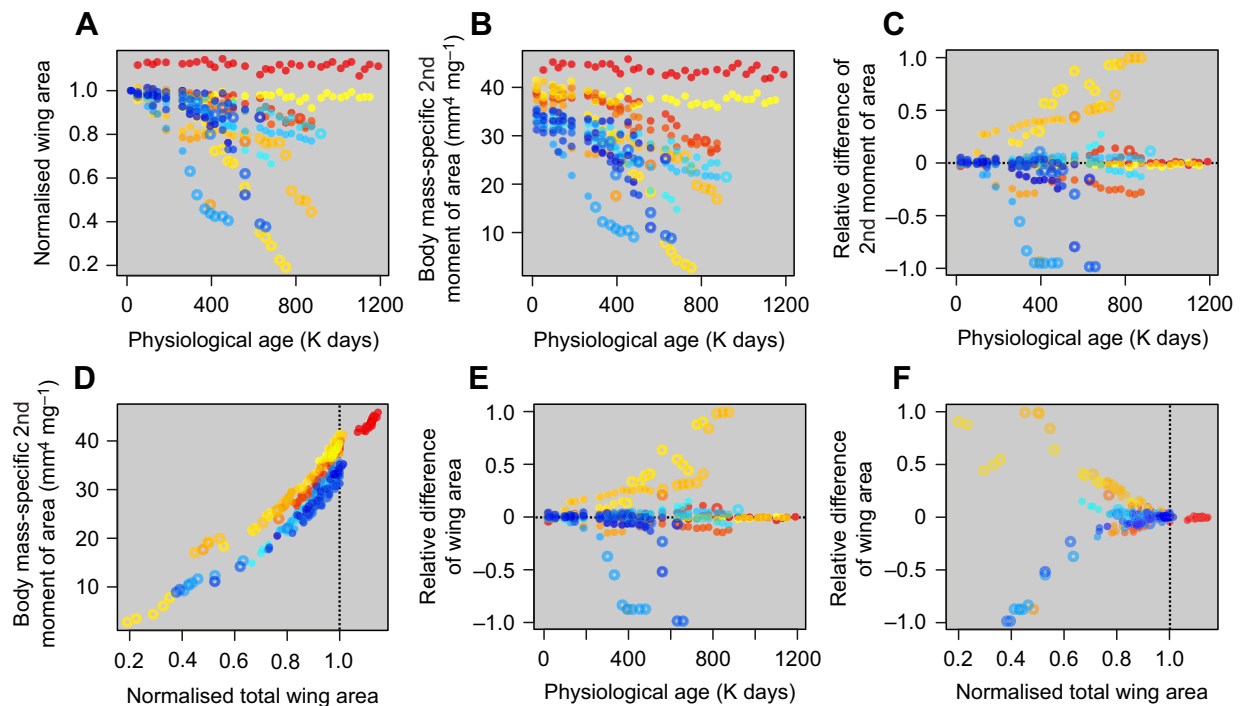

**Fig. 8. Relationships between wing area, 2nd moment of wing area and age in free-flight experiments for 'flight' (solid circle) and 'non-flight' (open circle) trials.** Individual flies are colour coded as in Fig. 7. Data are plotted as follows: (A) normalised area of both wings ( $\bar{S}$ ), (B) body mass-specific 2nd moment of wing area ( $S_2$ ) and (C) right minus left wing difference in  $S_2$  normalised to the sum ( $\Delta S_2$ ), all plotted against physiological age. (D) The 2nd moment of wing area ( $S_2$ ) linearly increases with increasing normalised total wing area. (E) Relative right minus left difference in wing area increases with age. (F) Right minus left area asymmetry normalised to the sum increases with decreasing wing area.

## DISCUSSION

### General aspects

Flight by active wing flapping is one of the most costly forms of locomotion (Casey and Ellington, 1989). Consequently, any change in the flight apparatus such as wing area and shape may compromise flight ability and efficiency and thus have serious consequences for the animal's fitness. To highlight the significance of wing area loss, we here investigated the factors that determine wing damage in house flies and scored the ability of these flies to fly with damaged wings. In contrast to previously published experiments in which wings of flies were artificially cut (e.g. Higginson et al., 2011; Mountcastle et al., 2016; Muijres et al., 2017; Roberts and Cartar, 2015), we investigated natural progression of wing damage under two housing conditions. One focus of the study was to map the progression of damage and to describe wing area loss throughout the animal's entire lifetime as a function of age and flight activity. We found that (i) wing damage typically starts to occur at the wing tip and progresses in a characteristic pattern (Figs 5 and 6), (ii) the rate of wing damage is independent of both age and activity at the initial area change, (iii) physiological age and flight activity are both predictors for wing damage, (iv) flight activity patterns are different between females and males (Figs 2–4), and (v) the flies' ability to produce forces for body mass support decreases with increasing age and decreasing wing area, shape and asymmetry between the two wings (Figs 8 and 9). Noteworthy, as age, flight activity and wing damage simultaneously change, the loss of flight ability probably results from various factors of which we only scored a small number.

### Impact of housing conditions

Investigations on flies kept in cages previously showed that behaviour and life history change depending on housing

conditions. The life expectancy of house flies depends strongly on activity, which is shaped by temperature, population density and sex ratio (Ragland and Sohal, 1973, 1975; Sohal and Buchan, 1981). To account for these factors, we monitored temperature throughout the measurements and used physiological age which considers temperature rather than the chronological age as a descriptor. Sex ratio was considered by keeping females and males in separate containers. It is obvious that higher population density increases the likelihood of wing collisions in flying animals. For this reason, we selected two housing conditions with vastly different population densities. Fig. 2 shows that house flies kept in the larger cage lived considerably longer and tended to have larger wing areas. The latter result might be due to the variance in rearing conditions because all tested flies stem from the same population. The longer lifespan of flies in the free-flight experiment is consistent with the idea that crowded housing conditions, elevated levels of activity and an elevated number of males in a group result in earlier senescence. Ragland and Sohal (1973), for example, showed that under certain conditions, male house flies without wings perish earlier than intact animals. The authors contributed this finding to leg muscle failure because of extended mating behaviour (see Introduction). This is also consistent with elevated longevity in less-active flies (Sohal and Buchan, 1981). Even if flies live longer, older flies do not necessarily retain their flight ability for longer. Lane et al. (2014) showed that flies with forced activity stopped flying earlier in their life than flies that were voluntarily active. Our data on flight activity might be shaped by these findings because the flies inside the container and the cage were continuously stimulated by flying conspecifics. This might explain the earlier onset of wing damage in the container compared with the free-flight experiment. Altogether, males are more likely to experience wing damage

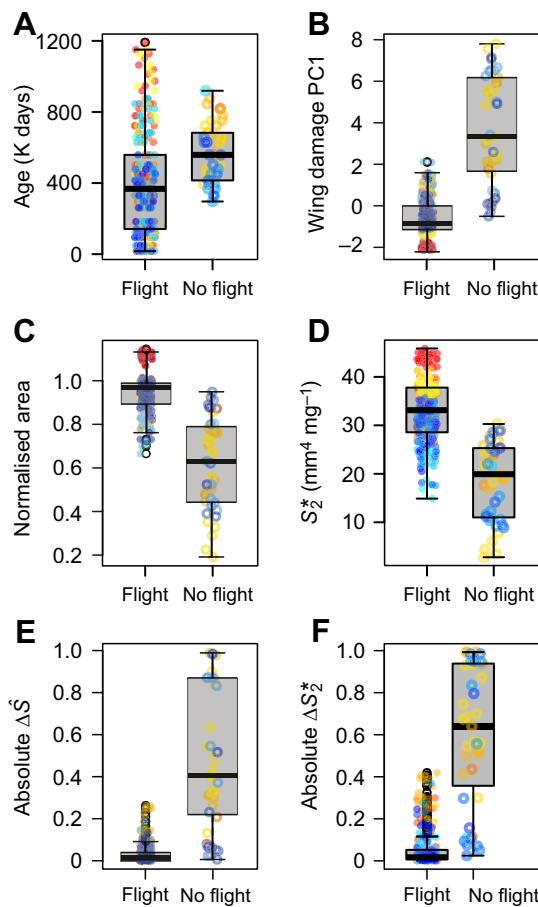

**Fig. 9. Comparison of wing area measures in flying (solid circle) and non-flying (open circle) house flies.** Data are shown as box plots and data for individual flies are plotted in colour. (A) Physiological age in both groups. (B) First principal component of wing measures. (C–F) Data for total wing area (C) and 2nd moment of area including their relative right minus left differences ( $S_2^*$ , D;  $\Delta S$ , E; and  $\Delta S_2^*$ , F). See legend to Fig. 2 for explanation of box plots.

than females, especially when males are kept in groups (Sohal and Buchan, 1981).

### Pattern and development of wing area loss

In nature, many insect wings are damaged, but in only a few cases is the damage severe (Anderson and Keyel, 2006; Rajabi et al., 2017; Rehan and Richards, 2010). To compare the damage pattern in our house flies with that of animals living in nature, we collected flies from the field between July and September 2018 using nets and traps at different horse stables around the University of Rostock, in Rostock Zoo, and around a house in Güstrow, Germany. Wing damage in these flies showed similar patterns to those in our experiments but damage was typically less pronounced. Typical patterns showed a loss of wing area at the wing tip and the membranous wing's trailing edge, similar to the wings shown in Figs 5 and 6. In total, 65% (161) of the trapped animals had intact wings, 24% (60) had only small damage and only 4% (10) of animals showed elevated wing damage. The finding that wing wear starts at the wing tip and trailing edge is also consistent with previous findings on bumblebees (Cartar, 1992). Moreover, Rajabi et al. (2017) reported wild dragonflies with both small (~10% area loss) and severe damage in single wings with a loss of up to ~3/4 the initial wing area. Noteworthy, insect wings may be damaged by losing surface material without losing wing area. This is due to

cracking and tearing of veins and wing membranes, which has recently been reviewed by Rajabi et al. (2020).

As wing damage accumulates over time, the speed of area loss often changes with increasing age of an insect. Several previously published studies found evidence for an increasing rate of damage with increasing time, resulting in an exponential loss in area (Foster and Cartar, 2011; Higginson and Barnard, 2004). However, other authors reported an opposite trend in which wing area loss asymptotically saturates with increasing age. Some of these findings may be explained by the use of an ordinal instead of an interval scale for scoring damage (e.g. Mueller and Wolf-Mueller, 1993; O'Neill et al., 2015). Other authors suggested that a frayed wing tip becomes more compliant and is thus less prone to damage (Mountcastle and Combes, 2014). We observed that in house flies wing damage typically stabilised after an exponential loss. Our logistic function in Fig. 6 combines these two trends, showing an exponential increase at an early stage of wing area loss and an exponential decrease at the late stage. This finding is consistent with (i) the initial increase (~5% area loss) in honey bees (Higginson and Barnard, 2004), (ii) the assumption that existing damage spreads more easily than initial damage (Foster and Cartar, 2011), and (iii) an increased number of wing collisions owing to changes in wing kinematics and manoeuvrability (Foster and Cartar, 2011). If haemolymph-carrying veins are damaged, wings may even desiccate (Pass et al., 2015; Steppan, 2000; Vincent and Wegst, 2004). Dried wings are more brittle, more stiff, have altered mechanical properties, and should thus exhibit more damage (Hou et al., 2015). As haemolymph circulation also decreases with increasing age of an insect, desiccation is thus a factor that might explain our findings (Arnold, 1964; Salcedo and Socha, 2020).

However, the steepness of wing area loss at  $t_{tp}$  (slope) suggests that wing wear in house flies flying in the cylindrical containers is approximately 20 times faster, once begun, than in flies flying inside the larger free-flight cage (Table 1). This result supports the previous assumptions that collisions are the main source of damage to appendages, as suggested for fish (Latremouille, 2003), birds (Francis and Wood, 1989) and several insect species (Burkhard et al., 2002; Foster and Cartar, 2011; O'Neill et al., 2015; Rhainds and Brodersen, 2012). This finding is in line with the difficulties of using wing damage for age grading in wild-caught specimens (Allsopp, 1985; Hayes and Wall, 1999; Lee et al., 2006; Nalepa, 2012; Rhainds and Brodersen, 2012). The cases in which age was successfully derived from wing damage in insects may potentially be explained by flight activity and the number of object collisions (Hargrove, 2020; Hayes et al., 1998; Irvin and Hoddle, 2009; Mueller and Wolf-Mueller, 1993). We have no evidence that our handling procedure and anaesthesia facilitated wing damage.

### Wing damage and flight ability

Insects compensate for the loss of wing area by changes in wing kinematics. As already mentioned in the Introduction, pronounced changes include an increase in both wingbeat frequency and amplitude in the damaged wings. If the two wings are differently damaged, amplitude may also decrease in the wing having the larger surface area. Wing damage often attenuates flight performance such as speed (Combes et al., 2010; Fischer and Kutsch, 2000; Haas and Cartar, 2008; Jantzen and Eisner, 2008; Muijres et al., 2017), acceleration and manoeuvrability (Combes et al., 2010; Haas and Cartar, 2008; Mountcastle et al., 2016), and load-lifting capacity (Buchwald and Dudley, 2010; Fernández et al., 2017; Johnson and Cartar, 2014; Roberts and Cartar, 2015). The degree of compensation is limited by several factors, including mechanical



constraints of the wing hinge, maximum frequency of muscle contraction, power output of flight muscles, limits involved in left–right asymmetries, but also by the loss of sensory feedback from the wings (Combes et al., 2010; Lehmann and Dickinson, 1997).

Conventional quasi-steady aerodynamic theory in insect flight links lift production to wing area and characteristic wing velocity. Previous studies suggested maximum lift production in insects of twice the body weight (Lehmann and Dickinson, 1998; Marden, 1987). We thus predicted that an area loss of more than ~50% should hinder active flight in house flies. Fig. 9C shows that the lower quartile of flight trials corresponds to  $\hat{S}=0.89$  (~10% loss) and the lower whisker to  $\hat{S}=0.76$  (~25% loss). The minimum for an actively flying animal was  $\hat{S}=0.67$  (~33% loss). These data are somewhat below the predicted value but the last of these is similar to the 33% found by Ragland and Sohal (1973) for flying insects. Moreover, our finding is clearly within the range from ~20% to more than ~50% area loss that has previously been published for various insect species (Fischer and Kutsch, 2000; Haas and Cartar, 2008; Jantzen and Eisner, 2008; Kassner et al., 2016). As asymmetrical wing area loss may also unbalance aerodynamic force production on the left and right body side (Figs 8C,E,F and 9E,F), flight ability may additionally be attenuated by the induction of turning moments around the yaw, pitch and roll axis of the fly body. Fig. 9E shows that the area difference for ‘flying’ animals was ~0.02 median and ~0.26 maximum for a single fly. In ‘non-flying’ animals, median area asymmetry was ~0.40. If flight capacity is mainly constrained by asymmetrical force generation, these differences might reflect the limit that a house fly is able to compensate by neuromuscular-induced changes in wing kinematics such as alterations in wingbeat amplitude, angle of attack, and rotational speed and timing at stroke reversal. We found similar values for the left–right difference in 2nd moment of area with a threshold of 0.4–0.6 between flight and no flight (Fig. 9F). This result is in good agreement with the finding in *Drosophila hydei* that a ~50% unilateral loss of the wing’s 2nd moment of area still allows active flight (Mujires et al., 2017). In house flies, 50% of the 2nd moment of area is  $18 \text{ mm}^4 \text{ mg}^{-1}$ , which is close to the lower whisker of the box blot for ‘flying’ flies (Fig. 9D).

In sum, our study has confirmed previous findings on wing damage and its significance for flight in insects. A missing link between wing damage and flight ability is elaborate data on aerodynamic forces and moments, including the changes in power requirements for flapping damaged wings. This is of ecological interest because previous studies on fish, birds, bats and insects showed that damage to appendages does not necessarily increase energy consumption during locomotion (Fu et al., 2013; Kingsolver, 1999; Voigt, 2013; Webb, 1973). Computer simulations of a phorid fly with unilateral wing damage, for example, showed that total aerodynamic power did not differ much between intact and damaged animals (Lyu et al., 2020). Similar findings have been reported for bumblebee wings. Although wing wear in bumblebees leads to changes in aerodynamic force coefficients and power requirements for flight (induced and profile power), the overall effect was small compared with intact conspecifics (Hedenström et al., 2001). By contrast, flight with moulting wings in humming birds and clipped wings in large moths requires higher metabolic rates than flight with intact wings (Chai, 1997; Fernández et al., 2017). Thus, to further investigate the significance of wing damage in house flies, the presented data are currently being used in a follow-up study to determine the changes in aerodynamic forces, moments and power expenditure in flight with damaged wings using a computational fluid dynamics approach.

### Acknowledgements

The authors appreciate help with the experiments and sound analysis algorithm from student intern Evan Grant. We also thank the technicians Bärbel Redlich-Witt, Birgit Wobith and Annegret Mahrwald for their help with fly breeding. Anna Griebach helped with wing area tracing. H.-N.W. is grateful to Wolf Hanke, Alexander Meister, Sixin Zhang and Kai Schneider for discussions on data analyses. The authors also received helpful input from three anonymous reviewers and appreciate the work put into copy-editing this article.

### Competing interests

The authors declare no competing or financial interests.

### Author contributions

Conceptualization: H.-N.W., F.-O.L.; Methodology: H.-N.W., T.E., F.-O.L.; Software: H.-N.W., T.E.; Formal analysis: H.-N.W., T.E.; Investigation: H.-N.W.; Resources: T.E.; Writing - original draft: H.-N.W.; Writing - review & editing: F.-O.L.; Visualization: H.-N.W., F.-O.L.; Supervision: F.-O.L.; Project administration: F.-O.L.; Funding acquisition: F.-O.L. (AIFIT, RISE), H.-N. W. (RISE).

### Funding

This work was financially supported by the Agence Nationale de la Recherche (ANR, project AIFIT), the Deutsche Forschungsgemeinschaft (DFG, grant LE905/17-1), and the German Academic Exchange Service program RISE (Deutscher Akademischer Austauschdienst) for Evan Grant. The authors were granted access to the HPC resources of TGCC (Très grand centre du calcul du CEA) under the allocation no. 2018-91664 attributed by GENCI (Grand équipement national de calcul intensif).

### Data availability

Data are available from the Dryad digital repository (Lehmann, 2021): [dryad.t1g1jw39](https://doi.org/10.1101/2021.07.14.451139).

### References

- Alcock, J. (1996). Male size and survival: the effects of male combat and bird predation in Dawson’s burrowing bees, *Amegilla dawsoni*. *Ecol. Entomol.* **21**, 309–316. doi:10.1046/j.1365-2311.1996.00007.x
- Allsopp, R. (1985). Wing fray in *Glossina morsitans centralis* Machado (Diptera: Glossinidae). *Bull. Entomol. Res.* **75**, 1–11. doi:10.1017/S0007485300014127
- Anderson, K. E. and Keyel, A. C. (2006). Mating flight, metrosis, and semi-claustality in the seed-harvester ant *Pogonomyrmex salinus* (Hymenoptera, Formicidae). *Insectes Soc.* **53**, 92–96. doi:10.1007/s00040-005-0840-y
- Arnold, J. W. (1964). Blood circulation in insect wings. *Memoirs Entomol. Soc. Can.* **96**, 5–60. doi:10.4039/entm9638fv
- Benson, W. W. (1972). Natural selection for Müllerian mimicry in *Heliconius erato* in Costa Rica. *Science* **176**, 936–939. doi:10.1126/science.176.4037.936
- Buchwald, R. and Dudley, R. (2010). Limits to vertical force and power production in bumblebees (Hymenoptera: *Bombus impatiens*). *J. Exp. Biol.* **213**, 426–432. doi:10.1242/jeb.033563
- Burkhard, D. U., Ward, P. I. and Blanckenhorn, W. U. (2002). Using age grading by wing injuries to estimate size-dependent adult survivorship in the field: a case study of the yellow dung fly *Scathophaga stercoraria*. *Ecol. Entomol.* **27**, 514–520. doi:10.1046/j.1365-2311.2002.00453.x
- Cartar, R. V. (1992). Morphological senescence and longevity: an experiment relating wing wear and life span in foraging wild bumble bees. *J. Anim. Ecol.* **61**, 225–231. doi:10.2307/5525
- Casey, T. M. and Ellington, C. P. (1989). Energetics of insect flight. In *Energy Transformations in Cells and Organisms* (ed. W. Wieser and E. Gnaiger), pp. 200–210. Stuttgart: Thieme.
- Chai, P. (1997). Hummingbird hovering energetics during moult of primary flight feathers. *J. Exp. Biol.* **200**, 1527–1536. doi:10.1242/jeb.200.10.1527
- Combes, S. A., Crall, J. D. and Mukherjee, S. (2010). Dynamics of animal movement in an ecological context: dragonfly wing damage reduces flight performance and predation success. *Biol. Lett.* **6**, 426–429. doi:10.1098/rsbl.2009.0915
- Danzer, A. (1956). Der Flugapparat der Dipteren als Resonanzsystem. *Z. Vgl. Physiol.* **38**, 259–283. doi:10.1007/BF00341301
- Davies, N. B. (1978). Territorial defence in the speckled wood butterfly (*Pararge aegeria*): the resident always wins. *Anim. Behav.* **26**, 138–147. doi:10.1016/0003-3472(78)90013-1
- Dukas, R. and Dukas, L. (2011). Coping with nonrepairable body damage: effects of wing damage on foraging performance in bees. *Anim. Behav.* **81**, 635–638. doi:10.1016/j.anbehav.2010.12.011
- Ellington, C. P. (1984). The aerodynamics of hovering insect flight. I. The quasi-steady analysis. *Philos. Trans. R. Soc. Lond. B* **305**, 1–15. doi:10.1098/rstb.1984.0049

- Fernández, M. J., Springthorpe, D. and Hedrick, T. L.** (2012). Neuromuscular and biomechanical compensation for wing asymmetry in insect hovering flight. *J. Exp. Biol.* **215**, 3631-3638. doi:10.1242/jeb.073627
- Fernández, M. J., Driver, M. E. and Hedrick, T. L.** (2017). Asymmetry costs: effects of wing damage on hovering flight performance in the hawkmoth *Manduca sexta*. *J. Exp. Biol.* **220**, 3649-3656. doi:10.1242/jeb.153494
- Fischer, H. and Kutsch, W.** (2000). Relationships between body mass, motor output and flight variables during free flight of juvenile and mature adult locusts, *Schistocerca gregaria*. *J. Exp. Biol.* **203**, 2723-2735. doi:10.1242/jeb.203.18.2723
- Foster, D. J. and Cartar, R. V.** (2011). What causes wing wear in foraging bumble bees? *J. Exp. Biol.* **214**, 1896-1901. doi:10.1242/jeb.051730
- Francis, C. M. and Wood, D. S.** (1989). Effects of age and wear on wing length of wood-warblers (Efecto de la edad y el desgaste en el largo del ala de Emberizidos (Emberizidae)). *J. Field Ornithol.* **60**, 495-503.
- Fu, C., Cao, Z.-D. and Fu, S.-J.** (2013). The effects of caudal fin amputation on metabolic interaction between digestion and locomotion in juveniles of three cyprinid fish species with different metabolic modes. *Comp. Biochem. Physiol. A* **164**, 456-465. doi:10.1016/j.cbpa.2012.12.015
- Haas, C. A. and Cartar, R. V.** (2008). Robust flight performance of bumble bees with artificially induced wing wear. *Can. J. Zool.* **86**, 668-675. doi:10.1139/Z08-034
- Hargrove, J. W.** (1975). The flight performance of tsetse flies. *J. Insect Physiol.* **21**, 1385-1395. doi:10.1016/0022-1910(75)90264-4
- Hargrove, J. W.** (2020). A model for the relationship between wing fray and chronological and ovarian ages in tsetse (*Glossina* spp.). *Med. Vet. Entomol.* **34**, 251-263. doi:10.1111/mve.12439
- Hayes, E. J. and Wall, R.** (1999). Age-grading adult insects: a review of techniques. *Physiol. Entomol.* **24**, 1-10. doi:10.1046/j.1365-3032.1999.00104.x
- Hayes, E. J., Wall, R. and Smith, K. E.** (1998). Measurement of age and population age structure in the blowfly, *Lucilia sericata* (Meigen) (Diptera: Calliphoridae). *J. Insect Physiol.* **44**, 895-901. doi:10.1016/S0022-1910(98)00067-5
- Hedenström, A., Ellington, C. P. and Wolf, T. J.** (2001). Wing wear, aerodynamics and flight energetics in bumblebees (*Bombus terrestris*): an experimental study. *Funct. Ecol.* **15**, 417-422. doi:10.1046/j.0269-8463.2001.00531.x
- Higginson, A. D. and Barnard, C. J.** (2004). Accumulating wing damage affects foraging decisions in honeybees (*Apis mellifera* L.). *Ecol. Entomol.* **29**, 52-59. doi:10.1111/j.0307-6946.2004.00573.x
- Higginson, A. D. and Gilbert, F.** (2004). Paying for nectar with wingbeats: a new model of honeybee foraging. *Proc. Roy. Soc. Lond. B* **271**, 2595-2603. doi:10.1098/rspb.2004.2866
- Higginson, A. D., Barnard, C. J., Tofilski, A., Medina, L. and Ratnieks, F.** (2011). Experimental wing damage affects foraging effort and foraging distance in honeybees *Apis mellifera*. *Psyche* **2011**, 419793. doi:10.1155/2011/419793
- Hou, D., Yin, Y., Zhao, H. and Zhong, Z.** (2015). Effects of blood in veins of dragonfly wing on the vibration characteristics. *Comp. Biol. Med.* **58**, 14-19. doi:10.1016/j.combiomed.2014.12.018
- Irvin, N. A. and Hoddle, M. S.** (2009). Egg maturation, oosorption, and wing wear in *Gonatocerus shmeadi* (Hymenoptera: Mymaridae), an egg parasitoid of the glassy-winged sharpshooter, *Homalodisca vitripennis* (Hemiptera: Cicadellidae). *Biol. Control* **48**, 125-132. doi:10.1016/j.biocontrol.2008.10.013
- Jantzen, B. and Eisner, T.** (2008). Hindwings are unnecessary for flight but essential for execution of normal evasive flight in Lepidoptera. *Proc. Natl. Acad. Sci. USA* **105**, 16636-16640. doi:10.1073/pnas.0807223105
- Johnson, S. A. and Cartar, R. V.** (2014). Wing wear, but not asymmetry in wear, affects load-lifting capability in bumble bees *Bombus impatiens*. *Can. J. Zool.* **92**, 179-184. doi:10.1139/cjz-2013-0229
- Kammerer, P.** (1907). Regeneration des Dipterenflügels beim Imago. *Arch. Entwicklunsmech. Organ.* **25**, 349-360. doi:10.1007/BF02292171
- Kassner, Z., Dafni, E. and Ribak, G.** (2016). Kinematic compensation for wing loss in flying damselflies. *J. Insect Physiol.* **85**, 1-9. doi:10.1016/j.jinsphys.2015.11.009
- Kingsolver, J. G.** (1999). Experimental analyses of wing size, flight, and survival in the western white butterfly. *Evolution* **53**, 1479-1490. doi:10.1111/j.1558-5646.1999.tb05412.x
- Kiritani, K., Yamashita, H. and Yamamura, K.** (2013). Beak marks on butterfly wings with special reference to Japanese black swallowtail. *Popul. Ecol.* **55**, 451-459. doi:10.1007/s10144-013-0375-4
- Kříženecký, J.** (1914). Experimentelle und theoretische Untersuchungen über die Restitution der Insektenflügel. *Arch. Entwicklunsmech. Organ.* **39**, 177-216. doi:10.1007/BF02267087
- Lane, S. J., Frankino, W. A., Elekonich, M. M. and Roberts, S. P.** (2014). The effects of age and lifetime flight behavior on flight capacity in *Drosophila melanogaster*. *J. Exp. Biol.* **217**, 1437-1443. doi:10.1242/jeb.095646
- Latremouille, D. N.** (2003). Fin erosion in aquaculture and natural environments. *Rev. Fish. Sci.* **11**, 315-335. doi:10.1080/10641260390255745
- Lee, J. C., Leibe, G. L. and Heimpel, G. E.** (2006). Broken wing fringe setae as a relative estimate of parasitoid age. *Entomol. Exp. Appl.* **121**, 87-92. doi:10.1111/j.1570-8703.2006.00446.x
- Lehmann, F.-O.** (2021). Flight activity and age cause wing damage in house flies, Dryad, Dataset. <https://doi.org/10.5061/dryad.t1g1jw39>.
- Lehmann, F.-O. and Dickinson, M. H.** (1997). The changes in power requirements and muscle efficiency during elevated force production in the fruit fly, *Drosophila melanogaster*. *J. Exp. Biol.* **200**, 1133-1143. doi:10.1242/jeb.200.7.1133
- Lehmann, F.-O. and Dickinson, M. H.** (1998). The control of wing kinematics and flight forces in fruit flies (*Drosophila* spp.). *J. Exp. Biol.* **201**, 385-401. doi:10.1242/jeb.201.3.385
- Lyu, Y. Z., Zhu, H. J. and Sun, M.** (2020). Wing kinematic and aerodynamic compensations for unilateral wing damage in a small phorid fly. *Phys. Rev. E* **101**, 012412. doi:10.1103/PhysRevE.101.012412
- Marden, J. H.** (1987). Maximum lift production during takeoff in flying animals. *J. Exp. Biol.* **130**, 235-258. doi:10.1242/jeb.130.1.235
- Monge-Nájera, J., Hernández, F., Gonzáles, M. I., Soley, J., Araya, J. and Zolla, S.** (1998). Spatial distribution, territoriality and sound production by tropical cryptic butterflies (*Hamadryas*, Lepidoptera: Nymphalidae): implications for the "industrial melanism" debate. *Rev. Biol. Trop.* **46**, 297-330. doi:10.15517/rbt.v46i2.19532
- Mountcastle, A. M. and Combes, S. A.** (2014). Biomechanical strategies for mitigating collision damage in insect wings: structural design versus embedded elastic materials. *J. Exp. Biol.* **217**, 1108-1115. doi:10.1242/jeb.092916
- Mountcastle, A. M., Alexander, T. M., Switzer, C. M. and Combes, S. A.** (2016). Wing wear reduces bumblebee flight performance in a dynamic obstacle course. *Biol. Lett.* **12**, 20160294. doi:10.1098/rsbl.2016.0294
- Mueller, U. G. and Wolf-Mueller, B.** (1993). A method for estimating the age of bees: age-dependent wing wear and coloration in the wool-carder bee *Anthidium manicatum* (Hymenoptera: Megachilidae). *J. Insect Behav.* **6**, 529-537. doi:10.1007/BF01049530
- Mujires, F. T., Iwasaki, N. A., Elzinga, M. J., Melis, J. M. and Dickinson, M. H.** (2017). Flies compensate for unilateral wing damage through modular adjustments of wing and body kinematics. *Interface Focus* **7**, 20160103. doi:10.1098/rsfs.2016.0103
- Nalepa, C. A.** (2012). Wing wear is a poor estimate of age in *Cerceris fumipennis* (Hymenoptera, Crabronidae). *J. Hymenopt. Res.* **24**, 43-46. doi:10.3897/jhr.24.2091
- O'Neill, K. M., Delphia, C. M. and Pitts-Singer, T. L.** (2015). Seasonal trends in the condition of nesting females of a solitary bee: wing wear, lipid content, and oocyte size. *PeerJ* **3**, e930. doi:10.7717/peerj.930
- Pass, G., Tögel, M., Krenn, H. and Paululat, A.** (2015). The circulatory organs of insect wings: prime examples for the origin of evolutionary novelties. *Zool. Anzeiger* **256**, 82-95. doi:10.1016/j.jcz.2015.03.008
- Pinheiro, C. E. G.** (1990). Territorial hilltopping behavior of three swallowtail butterflies (Lepidoptera, Papilionidae) in Western Brazil. *J. Res. Lepid.* **29**, 134-142.
- Ragland, S. S. and Sohal, R. S.** (1973). Mating behavior, physical activity and aging in the housefly, *Musca domestica*. *Exp. Gerontol.* **8**, 135-145. doi:10.1016/0531-5565(73)90003-X
- Ragland, S. S. and Sohal, R. S.** (1975). Ambient temperature, physical activity and aging in the housefly, *Musca domestica*. *Exp. Gerontol.* **10**, 279-289. doi:10.1016/0531-5565(75)90005-4
- Rajabi, H., Schroeter, V., Eshghi, S. and Gorb, S. N.** (2017). The probability of wing damage in the dragonfly *Sympetrum vulgatum* (Anisoptera: Libellulidae): a field study. *Biol. Open* **6**, 1290-1293. doi:10.1242/bio.027078
- Rajabi, H., Dirks, J.-H. and Gorb, S. N.** (2020). Insect wing damage: causes, consequences and compensatory mechanisms. *J. Exp. Biol.* **223**, jeb215194. doi:10.1242/jeb.215194
- Rehan, S. M. and Richards, M. H.** (2010). The influence of maternal quality on brood sex allocation in the small carpenter bee, *Ceratina calcarata*. *Ethology* **116**, 876-887. doi:10.1111/j.1439-0310.2010.01804.x
- Rhainds, M. and Brodersen, G.** (2012). Wing wear of adult *Choristoneura fumiferana* (Lepidoptera: Tortricidae) in relation to age, sex, sex ratio, and presence of host plant. *Appl. Entomol. Zool.* **47**, 475-478. doi:10.1007/s13355-012-0137-3
- Roberts, J. C. and Cartar, R. V.** (2015). Shape of wing wear fails to affect load lifting in common eastern bumble bees (*Bombus impatiens*) with experimental wing wear. *Can. J. Zool.* **93**, 531-537. doi:10.1139/cjz-2014-0317
- Salcedo, M. K. and Socha, J. J.** (2020). Circulation in insect wings. *Integr. Comp. Biol.* **60**, 1208-1220. doi:10.1093/icb/icaa124
- Schindelin, J., Arganda-Carreras, I., Frise, E., Kaynig, V., Longair, M., Pietzsch, T., Preibisch, S., Rueden, C., Saalfeld, S., Schmid, B. et al.** (2012). Fiji: an open-source platform for biological-image analysis. *Nat. Meth.* **9**, 676-682. doi:10.1038/nmeth.2019
- Skovgård, H., Nachman, G.** (2004). Biological control of house flies *Musca domestica* and stable flies *Stomoxys calcitrans* (Diptera: Muscidae) by means of inundative releases of *Spalangia cameroni* (Hymenoptera: Pteromalidae). *Bull. Entomol. Res.* **94**, 555-567. doi:10.1079/BER2004322
- Sohal, R. S. and Buchan, P. B.** (1981). Relationship between physical activity and life span in the adult housefly, *Musca domestica*. *Exp. Gerontol.* **16**, 157-162. doi:10.1016/0531-5565(81)90040-1
- Sotavalta, O.** (1952a). *The Essential Factor Regulating the Wing-Stroke Frequency of Insects in Wing Mutilation and Loading Experiments and in Experiments at*

- Subatmospheric Pressure*, 15. Suomalaisen Eläin- ja Kasvitieteellisen Seuran Vanamon Eläintieteellisiä Julkaisuja.
- Sotavalta, O.** (1952b). Flight-tone and wing-stroke frequency of insects and the dynamics of insect flight. *Nature* **170**, 1057-1058. doi:10.1038/1701057a0
- Steppan, S. J.** (2000). Flexural stiffness patterns of butterfly wings (Papilionoidea). *J. Res. Lepidoptera*, **35**, 61-77.
- Vance, J. T.** (2009). Experimental and natural variation in hovering flight capacity in bees, Hymenoptera: Apidae. *UNLV Theses, Dissertations, Professional Papers, and Capstones*, Vol. 26: Digital Scholarship@UNLV.
- Vance, J. T. and Roberts, S. P.** (2014). The effects of artificial wing wear on the flight capacity of the honey bee *Apis mellifera*. *J. Insect Physiol.* **65**, 27-36. doi:10.1016/j.jinsphys.2014.04.003
- Vincent, J. F. V. and Wegst, U. G. K.** (2004). Design and mechanical properties of insect cuticle. *Arthropod Struct. Dev.* **33**, 187-199. doi:10.1016/j.asd.2004.05.006
- Voigt, C. C.** (2013). Bat flight with bad wings: is flight metabolism affected by damaged wings? *J. Exp. Biol.* **216**, 1516-1521. doi:10.1242/jeb.079509
- Webb, P. W.** (1973). Effects of partial caudal-fin amputation on the kinematics and metabolic rate of underyearling sockeye salmon (*Oncorhynchus nerka*) at steady swimming speeds. *J. Exp. Biol.* **59**, 565-582. doi:10.1242/jeb.59.3.565
- Weis-Fogh, T.** (1973). Quick estimates of flight fitness in hovering animals, including novel mechanisms for lift production. *J. Exp. Biol.* **59**, 169-230. doi:10.1242/jeb.59.1.169
- Werber, I.** (1907). Regeneration der exstirpierten Flügel beim Mehlkäfer (*Tenebrio molitor*). *Arch. Entwicklunsmech. Organ.* **25**, 344-348. doi:10.1007/BF02292170
- Werber, I.** (1911). Über regeneratähnliche Flügelmißbildung einer Stubenfliege (*Musca domestica* L.). *Zool. Anz.* **37**, 1-7.
- Wilson, D. M. and Weis-Fogh, T.** (1962). Patterned activity of co-ordinated motor units, studied in flying locusts. *J. Exp. Biol.*, **39**, 643-667. doi:10.1242/jeb.39.4.643
